# Supplementary material for: Natural biased signaling of hydroxycarboxylic acid receptor 3 and G protein-coupled receptor 84
Source: Cell Commun Signal. 2020 Feb 26;18:31. doi: 10.1186/s12964-020-0516-2 (PMC7045412; doi:10.1186/s12964-020-0516-2)
Supplement: Supplementary file 2 — Additional file 1: Figure S1 Basal activity and agonist-induced receptor internalization of HCA3 and GPR84. Figure S2 Differential, agonist-specific dynasore-sensitivity of HCA3 and GPR84 in DMR analyses. Figure S3 Concentration-response curves derived from DMR analyses of HCA3 and GPR84. Figure S4 DMR analyses of HCA1 and HCA2. Figure S5 No influence of dynasore, sucrose, gallein, MβCD, and barbardin on intracellular cAMP levels in empty vector transfected CHO-K1 cells in the presence of HCA3 and GPR84 agonists. Figure S6 Time course of ERK activation for HCA3 and GPR84. No calcium signals detected upon stimulation of HCA3 and GPR84. Figure S7 Basal activity and cAMP inhibitory signaling of HCA3 and GPR84 in HEK293-T cells. Figure S8 Cell surface expression of HCA3, GPR84, ADBR2, and V2R in the presence of dynasore, barbardin, and gallein. Figure S9 Dynasore-sensitivity of agonist-induced DMR responses of human, gorilla and orangutan HCA3. Figure S10 Lactic acid bacteria-derived HCA3 agonists do not activate GPR84 and HCA3 recruits β-arrestin-2. Figure S11 PTX-sensitive cAMP inhibitory response of Colo680N cells when stimulated with HCA3 agonists but no signal upon stimulation with GPR84 agonists. Table S1 Primers used for GPR84, dynamin-2, HCA3 amplification, sequencing and introduction of epitope tags. Table S2 Summary of Emax and EC50 values as determined from DMR, cAMP and ERK analyses of HCA3 and GPR84. Table S3 Summary of cAMP data acquired for HCA3 and GPR84 in absence and presence of dynasore, sucrose, barbardin, MβCD and gallein. Table S4. Summary of ERK data acquired for HCA3 and GPR84 in absence and presence of dynasore, sucrose, barbardin, MβCD, gallein, ZA, NSC23766 and Ly294002. Table S5. TPM values as downloaded from Expression Atlas: https://www.ebi.ac.uk/gxa/home . Supplementary Results and Discussion. (PDF 5177 kb) [file 12964_2020_516_MOESM1_ESM.pdf]

## *Supplementary Material*

# **Natural biased signaling of hydroxycarboxylic acid receptor 3 and G protein-coupled receptor 84**

Anna Peters<sup>1</sup>, Philipp Rabe<sup>1</sup>, Petra Krumbholz<sup>1</sup>, Hermann Kalwa<sup>2</sup>, Robert Kraft<sup>3</sup>, Torsten  
Schöneberg<sup>1</sup>, Claudia Stäubert<sup>1\*</sup>

<sup>1</sup> Rudolf Schönheimer Institute of Biochemistry, Medical Faculty, Leipzig University,  
Johannisallee 30, 04103 Leipzig, Germany

<sup>2</sup> Rudolf Böhm Institute of Pharmacology and Toxicology, Medical Faculty, Leipzig  
University, Härtelstraße 16-18, 04107 Leipzig, Germany

<sup>3</sup> Carl Ludwig Institute for Physiology, Medical Faculty, Leipzig University, 04103 Leipzig,  
Germany

Running Title: HCA<sub>3</sub> and GPR84 biased signaling

The authors have declared that no competing interests exist.

**Figure S1**

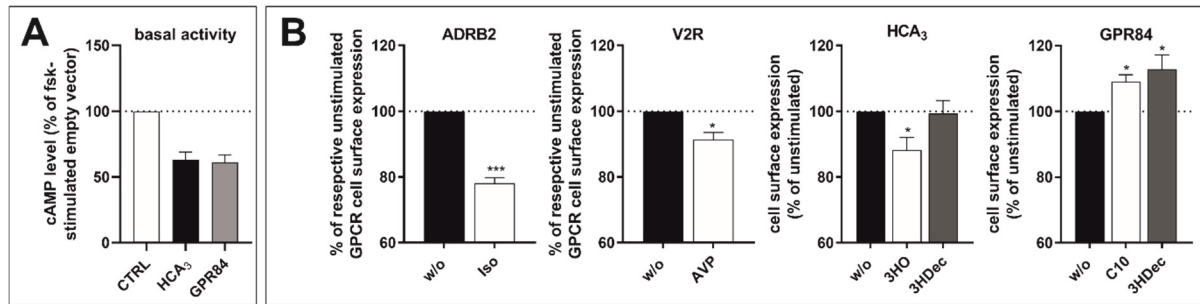

**Figure S1 Basal activity and agonist-induced receptor internalization of HCA<sub>3</sub> and GPR84.** CHO-K1 cells were transiently transfected with receptor constructs or empty vector (control). (A) Both, HCA<sub>3</sub> and GPR84, exhibited a basal cAMP inhibitory activity (cAMP level of empty vector-transfected forskolin-stimulated cells is set to 100 %) (B) The  $\beta_2$ -adrenergic receptor (ADRB2) and V2 vasopressin receptor (V2R) served as control, which showed 22 % and 9 % reduction of cell surface expression upon stimulation with 10  $\mu$ M isoprenalin and 10  $\mu$ M arginine vasopressin (AVP), respectively. 100  $\mu$ M 3HO but not 100  $\mu$ M 3HDec induced a significant reduction in cell surface expression of HCA<sub>3</sub>. GPR84 cell surface expression levels were increased in presence of 100  $\mu$ M C10 and 100  $\mu$ M 3HDec. Cell surface expression levels of respective receptor construct in absence of agonist is set to 100 %. Data is shown as mean  $\pm$  SEM of at least three independent experiments each carried out in triplicates. \*  $P \leq 0.05$ ; \*\*  $P \leq 0.01$ .

**Figure S2**

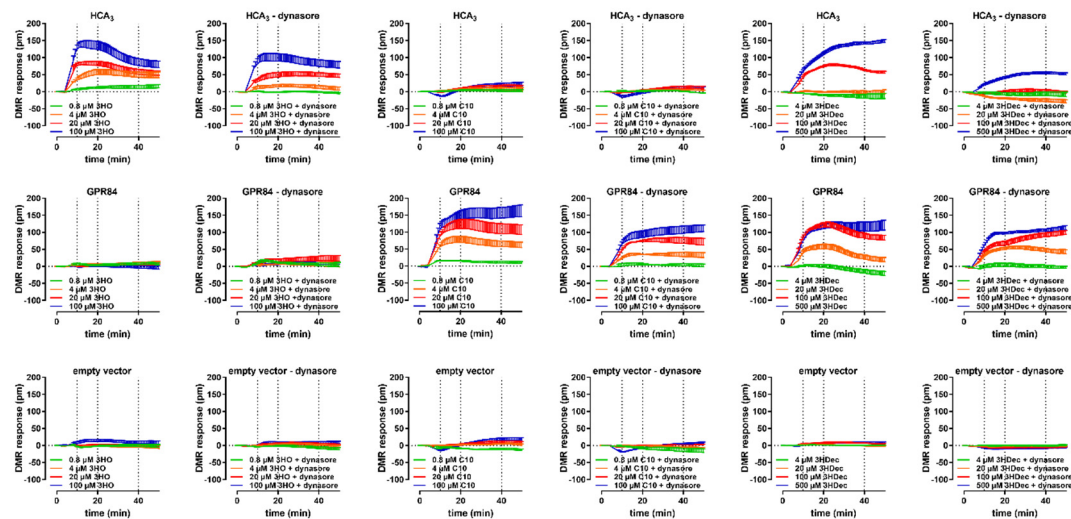

**Figure S2 Differential, agonist-specific dynasore-sensitivity of HCA<sub>3</sub> and GPR84 in DMR analyses.** CHO-K1 cells were transiently transfected with receptor constructs or empty vector, seeded in fibronectin-coated Epic plates and DMR responses were recorded. 3-hydroxyoctanoic acid (3HO) activated HCA<sub>3</sub> but not GPR84. Decanoic acid (C10) specifically activated GPR84 but not HCA<sub>3</sub>. 3-hydroxydecanoic acid (3HDec) activated both, HCA<sub>3</sub> and GPR84. No DMR response upon agonist stimulation was observed in cells transfected with empty vector. 80  $\mu$ M dynasore was used. Shown is the agonist-induced wavelength shift in pm as mean  $\pm$  SEM of three to five independent experiments, each carried out in triplicates. DMR at time points 10 min, 20 min and 40 min were extracted to generate Figure 1B and Figure S3.

**Figure S3**

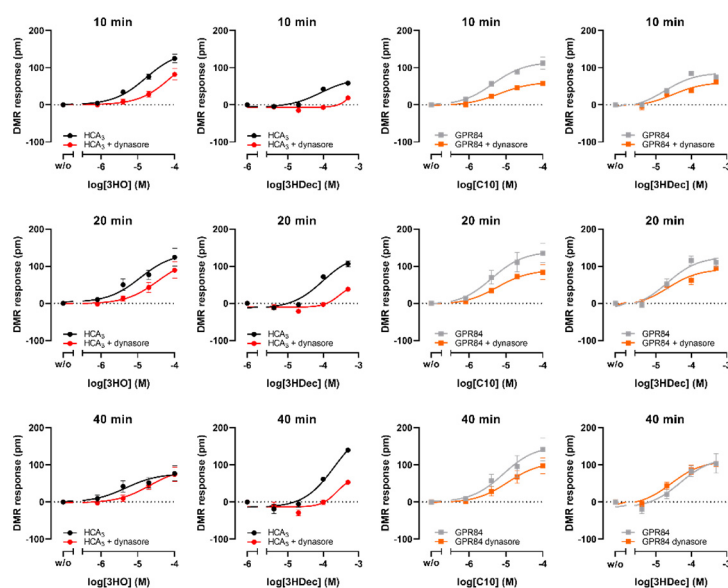

**Figure S3 Concentration-response curves derived from DMR analyses of HCA<sub>3</sub> and GPR84.** CHO-K1 cells were transiently transfected with receptor constructs or empty vector, seeded in fibronectin-coated Epic plates and DMR responses were recorded. Concentration-response curves in absence and presence of dynasore were derived from time points 10 min, 20 min and 40 min (Figure S2). Shown is the agonist-induced wavelength shift in pm as mean  $\pm$  SEM of three to five independent experiments, each carried out in triplicates.

**Figure S4**

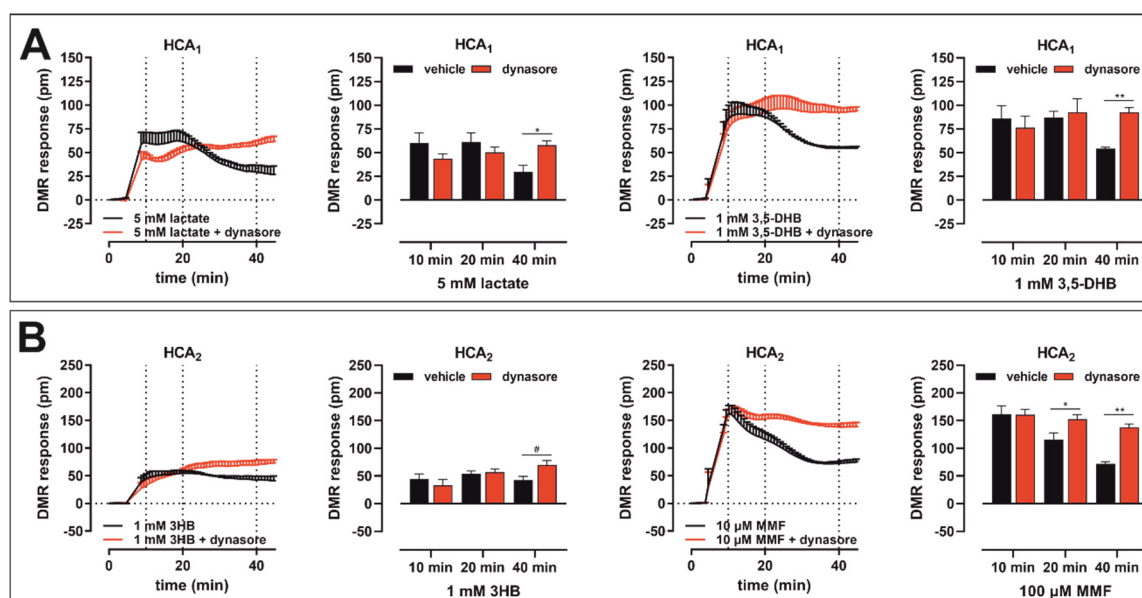

**Figure S4 DMR analyses of HCA<sub>1</sub> and HCA<sub>2</sub>.** CHO-K1 cells were transiently transfected with receptor constructs or empty vector, seeded in fibronectin-coated Epic plates and DMR responses were recorded. (A) The lactate- and 3,5-dihydroxybenzoic acid (3,5-DHB)-induced DMR response of HCA<sub>1</sub> transfected CHO-K1 cells and (B) the 3-hydroxybutyrate (3HB) and monomethylfumarate induced response of HCA<sub>2</sub> transfected CHO-K1 cells were at later time points affected by presence of dynasore. Shown is the agonist-induced wavelength shift in pm as mean  $\pm$  SEM of three to five independent experiments, each carried out in triplicates.

**Figure S5**

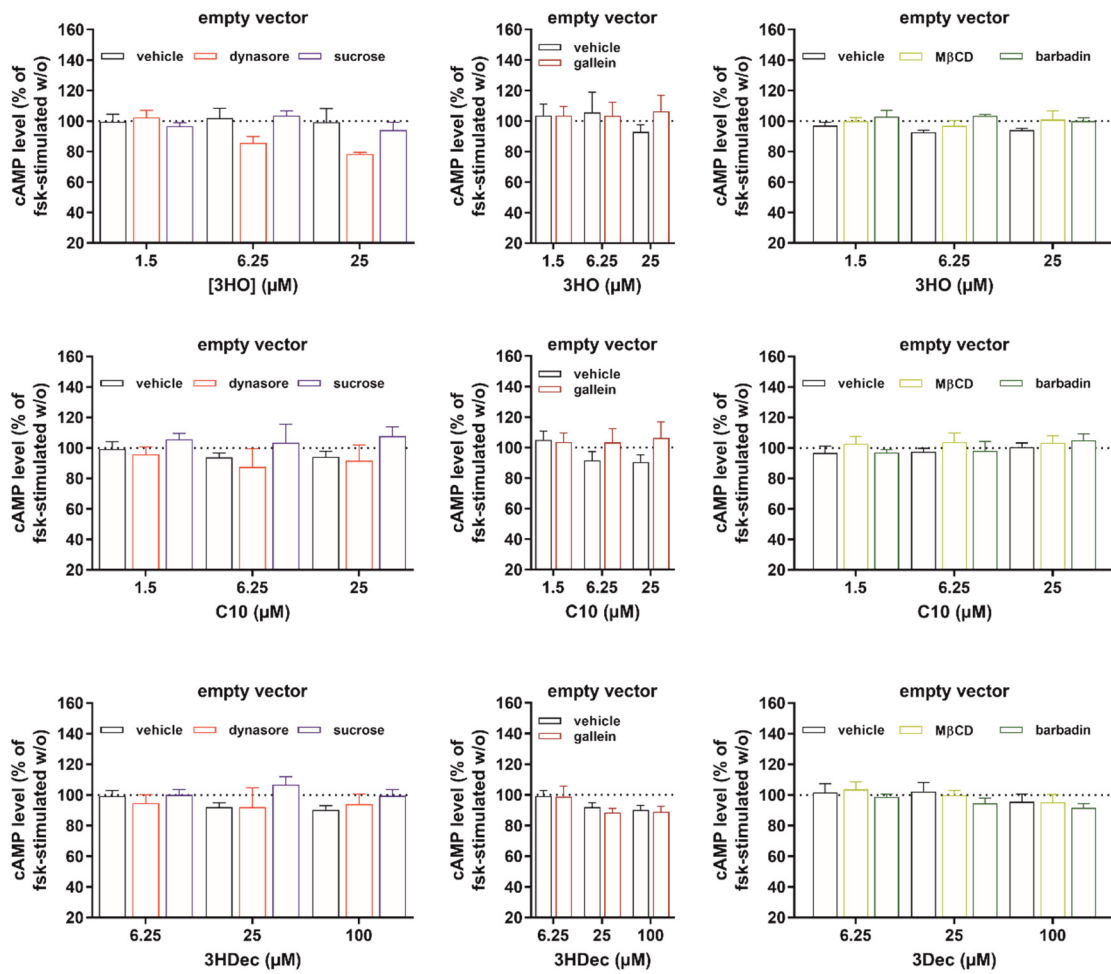

**Figure S5 No influence of dynasore, sucrose, gallein, MβCD, and barbardin on intracellular cAMP levels in empty vector transfected CHO-K1 cells in the presence of HCA<sub>3</sub> and GPR84 agonists. Fsk-induced cAMP level of empty vector-transfected cells in absence of agonist is set 100 %.**

**Figure S6**

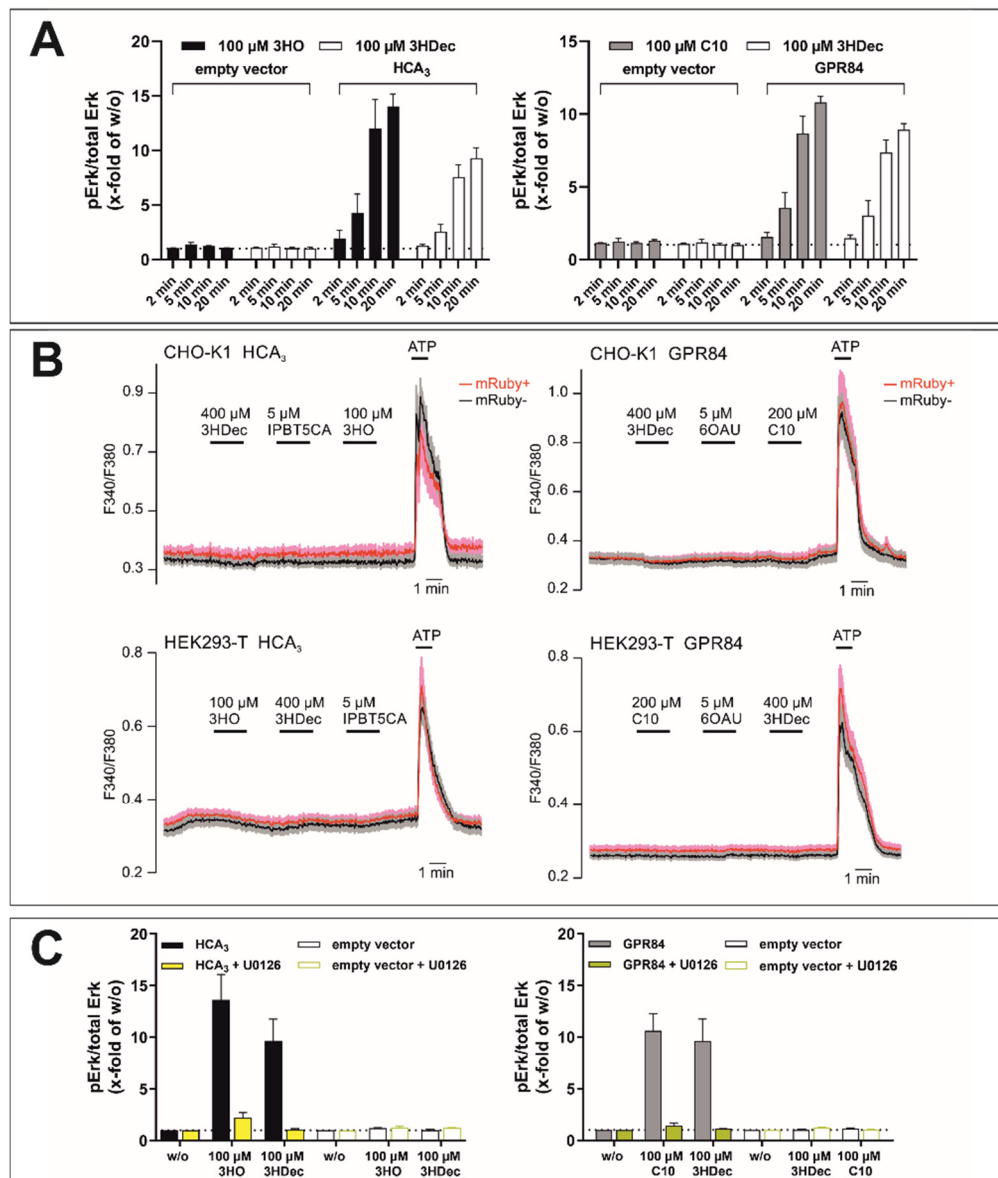

**Figure S6 Time course of ERK activation for HCA<sub>3</sub> and GPR84. No calcium signals detected upon stimulation of HCA<sub>3</sub> and GPR84.** (A) Agonist-induced phosphorylation of endogenous ERK 1/2 in cellular lysates of HCA<sub>3</sub> or GPR84 transfected CHO-K1 cells over time. (B) Fura 2-based calcium imaging experiments were performed in CHO-K1 and HEK293-T cells transiently transfected with either GPR84 or HCA<sub>3</sub> (both mRuby-tagged). The fluorescence ratio (F340/F380) represents the time course of calcium in mRuby-positive (mRuby+) and mRuby-negative (mRuby-) cells from the same coverslip. Each trace represents the average calcium signal  $\pm$  SEM from 10 CHO-K1 or 20 HEK293-T cells. The GPR84 agonists 3HDec (400  $\mu$ M), 6OAU (5  $\mu$ M), and C10 (200  $\mu$ M) were unable to induce calcium signals. The endogenous agonist ATP (100  $\mu$ M) evoked prominent calcium responses. Similarly, the HCA<sub>3</sub> agonists 3HDec (400  $\mu$ M), IPBT5CA (5  $\mu$ M), and 3HO (100  $\mu$ M) were ineffective, whereas ATP induced strong signals. (C) ERK activation of both HCA<sub>3</sub> and GPR84 was completely inhibited by 10  $\mu$ M U0126. (A, C) Data is given as mean  $\pm$  SEM of at least three independent experiments each carried out in triplicates.

**Figure S7**

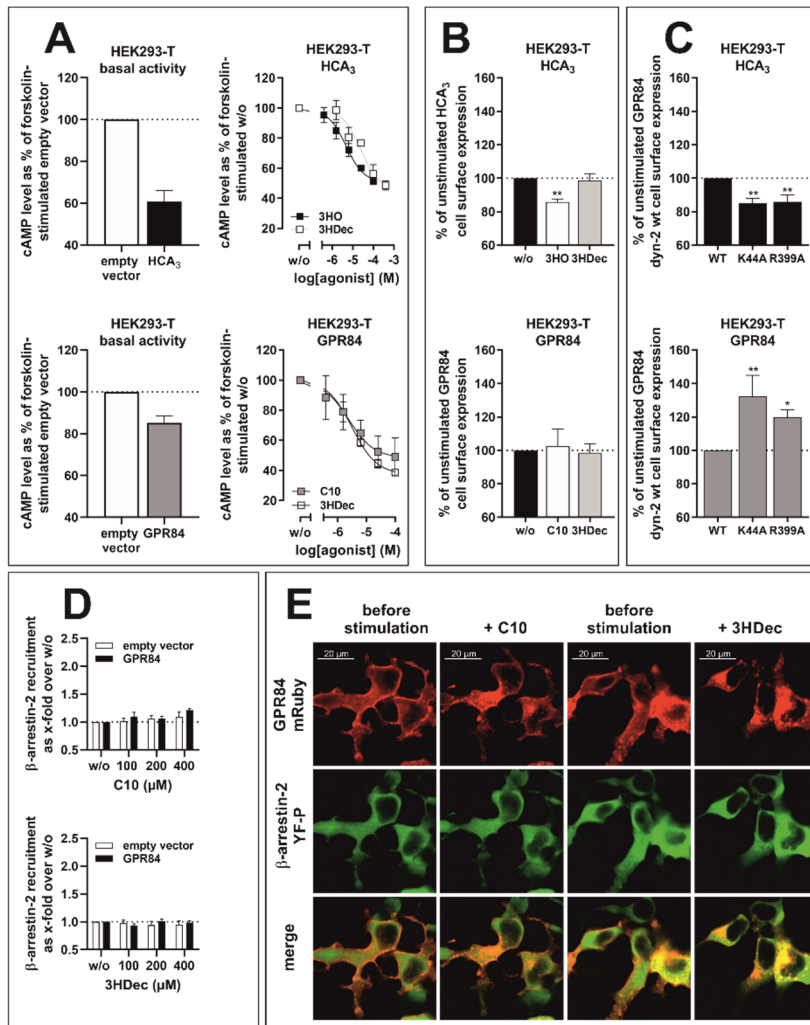

**Figure S7 Basal activity and cAMP inhibitory signaling of HCA<sub>3</sub> and GPR84 in HEK293-T cells.** (A) HCA<sub>3</sub> and GPR84 showed a basal activity in HEK293-T cells (cAMP level of empty vector-transfected fsk-stimulated cells is set to 100 %). Both receptors were activated in a concentration-dependent manner by their respective agonists as determined by cAMP inhibition assays (cAMP level of HCA<sub>3</sub> and GPR84 transfected cells in absence of agonist is set to 100 %, respectively.) (B) 100  $\mu$ M 3HO but not 100  $\mu$ M 3HDec induced a significant reduction in cell surface expression of HCA<sub>3</sub>. No reduction of cell surface expression was measured upon stimulation of GPR84 with 100  $\mu$ M 3HDec and 100  $\mu$ M C10. Cell surface expression level in absence of agonist is set to 100 %. (C) In comparison to dyn-2 wt, cell surface expression of HCA<sub>3</sub> but not GPR84 was significantly reduced when K44A or R399A were co-transfected. Cell surface expression level of dyn-2 wt co-transfected cells is set to 100 %. (D) HEK293-T cells stably expressing  $\beta$ -arrestin-2-EA cells transiently transfected with GPR84 were stimulated with C10 and 3HDec. Quantification of  $\beta$ -arrestin-2 recruitment using the PathHunter  $\beta$ -arrestin assay (Eurofins DiscoverX) showed no recruitment of  $\beta$ -arrestin-2 by GPR84 following agonist stimulation. Luminescence of GPR84 or empty vector transfected cells in absence of agonist is set 1, respectively. (E) Live-cell images of HEK293-T cells co-expressing GPR84-mRuby (red) and  $\beta$ -arrestin-2-YFP (green) were acquired before stimulation and 30 min post-stimulation with 100  $\mu$ M C10 or 100  $\mu$ M 3HDec. (A-D) Data is given as mean  $\pm$  SEM of at least three independent experiments each carried out in triplicates. \*\*  $P \leq 0.01$ .

**Figure S8**

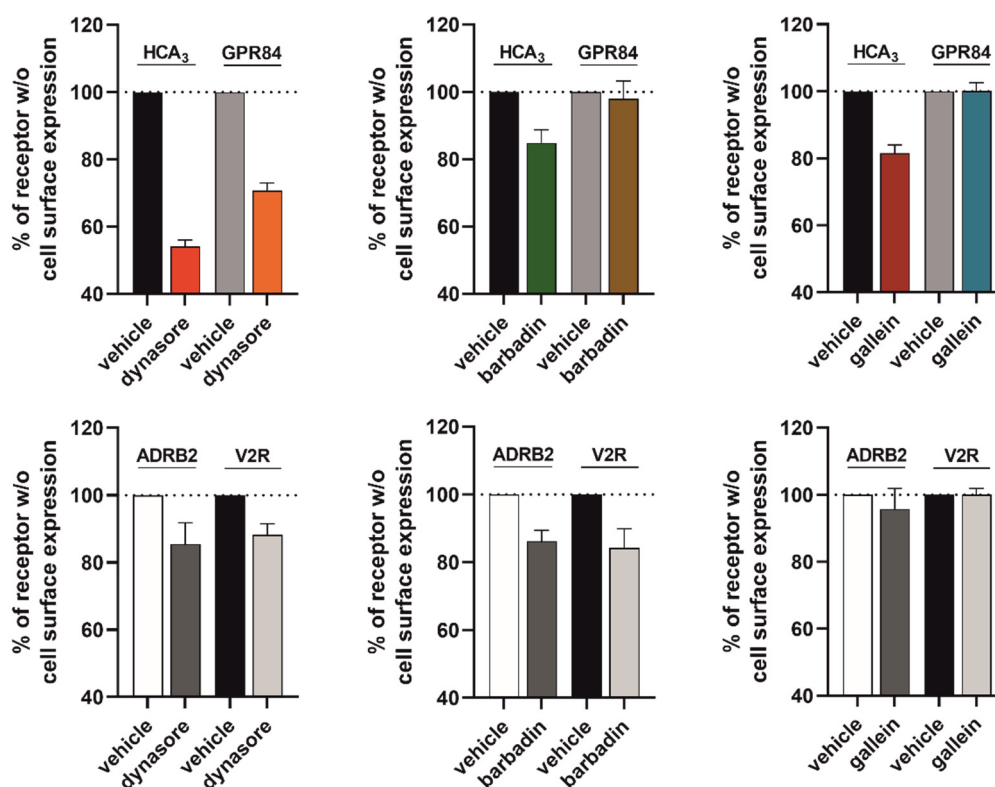

**Figure S8 Cell surface expression of HCA<sub>3</sub>, GPR84, ADRB2, and V2R in the presence of dynasore, barbardin, and gallein.** CHO-K1 cells were transiently transfected with receptor constructs and cell surface expression in absence of agonists but presence of 80  $\mu$ M dynasore, 50  $\mu$ M gallein and 100  $\mu$ M barbardin was determined. Cell surface expression level of respective receptor construct in absence of inhibitor is set to 100 %. Data is shown as mean  $\pm$  SEM of four independent experiments each carried out in triplicates.

**Figure S9**

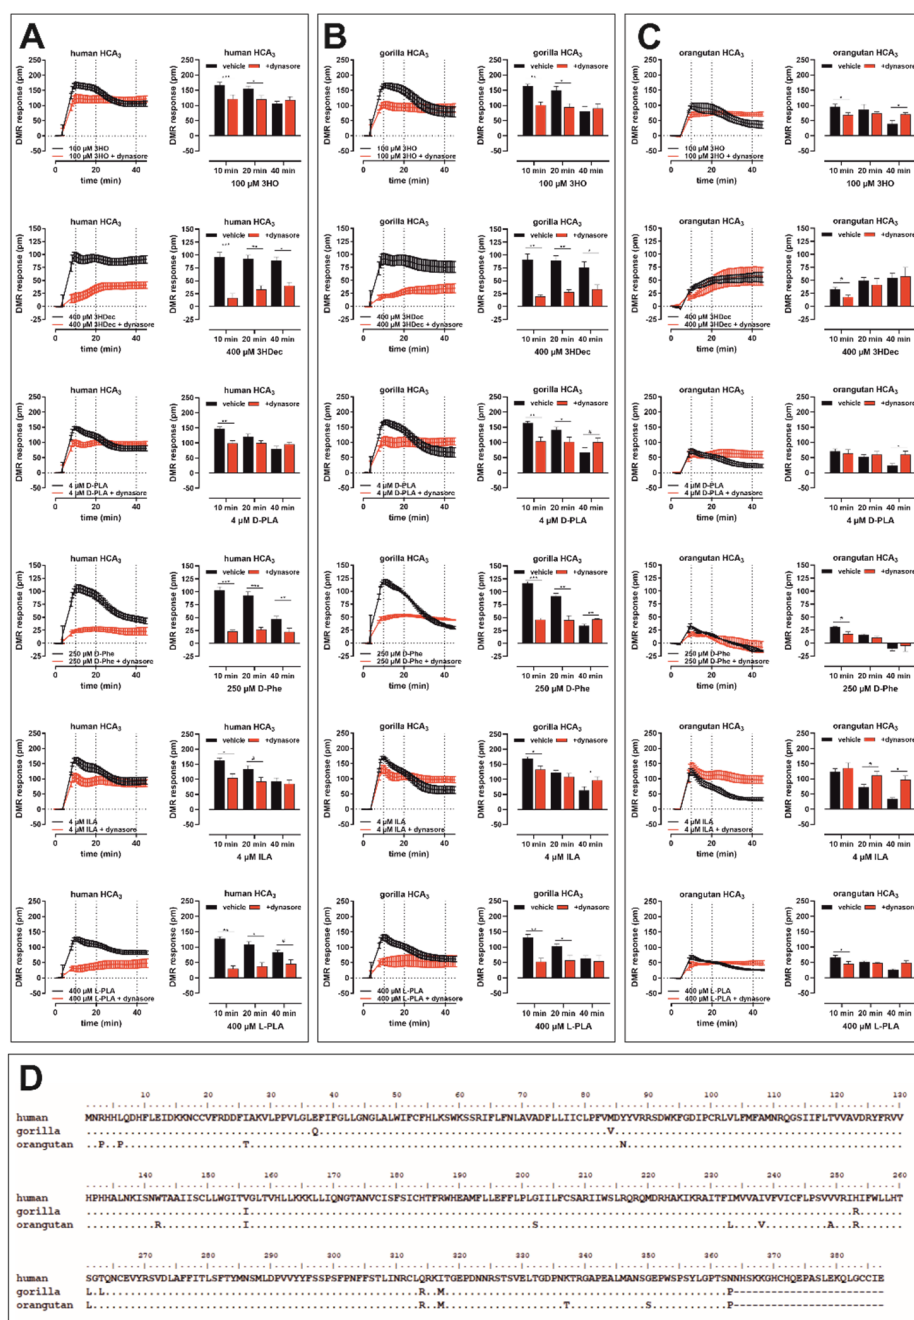

**Figure S9 Dynasore-sensitivity of agonist-induced DMR responses of human, gorilla and orangutan HCA<sub>3</sub>.** CHO-K1 cells were transiently transfected with HCA<sub>3</sub> orthologs, seeded in fibronectin-coated Epic<sup>®</sup> plates and DMR responses were recorded. Presence of dynasore similarly affected the DMR response of human HCA<sub>3</sub> (A) and gorilla HCA<sub>3</sub> (B) expressing CHO-K1 cells to 3HO, D-phenyllactic acid (D-PLA) and indole 3-lactic acid (ILA). In contrast, responses to 3HDec and D-phenylalanine (D-Phe) and L-phenyllactic acid (L-PLA) were almost completely diminished in presence of dynasore. (C) Orangutan HCA<sub>3</sub> DMR responses to different agonists in presence of dynasore showed a distinct pattern when compared to human and gorilla HCA<sub>3</sub>. A rather prolonged activation of the receptor in presence of dynasore was observed as also seen for human HCA<sub>1</sub> and HCA<sub>2</sub> (Figures S4A, S4B). Shown is the agonist-induced wavelength shift in pm as mean  $\pm$  SEM of three independent experiments, each carried out in triplicates. (D) Amino acid sequence alignment of human, gorilla and orangutan HCA<sub>3</sub>.

**Figure S10**

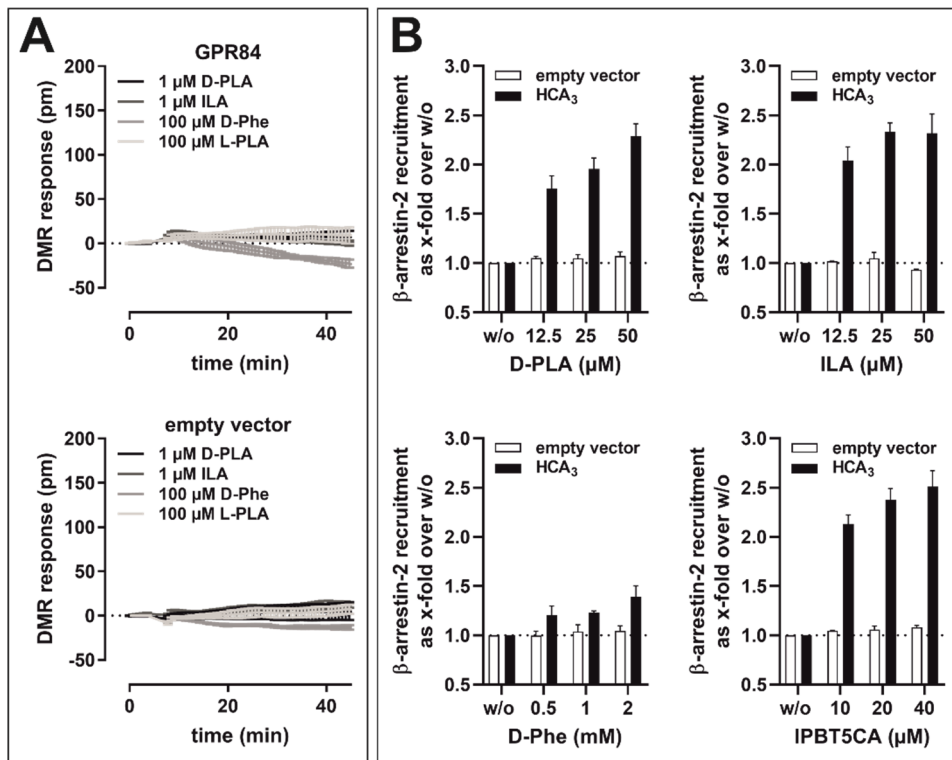

**Figure S10 Lactic acid bacteria-derived HCA<sub>3</sub> agonists do not activate GPR84 and HCA<sub>3</sub> recruits  $\beta$ -arrestin-2** (A) CHO-K1 cells were transiently transfected with receptor constructs or empty vector, seeded in fibronectin-coated Epic plates and DMR responses were recorded. None of the depicted HCA<sub>3</sub> agonists: D-phenyllactic acid (D-PLA), indole 3-lactic acid (ILA) and D-phenylalanine (D-Phe) activated GPR84 or empty vector-transfected CHO-K1 cells. Shown is the agonist-induced shift in pm as mean  $\pm$  SEM of three to five independent experiments, each carried out in triplicates. (B) HEK293-T cells stably expressing  $\beta$ -arrestin-2-EA were transiently transfected with HCA<sub>3</sub>. Quantification of  $\beta$ -arrestin-2 recruitment using the PathHunter  $\beta$ -arrestin assay (Eurofins DiscoverX) shows recruitment of  $\beta$ -arrestin-2 by HCA<sub>3</sub> following D-PLA, ILA, IPBT5CA but not D-Phe stimulation. Luminescence of HCA<sub>3</sub> or empty vector-transfected cells in absence of agonist is set 1, respectively. Data is given as mean  $\pm$  SEM of three independent experiments each carried out in triplicates.

**Figure S11**

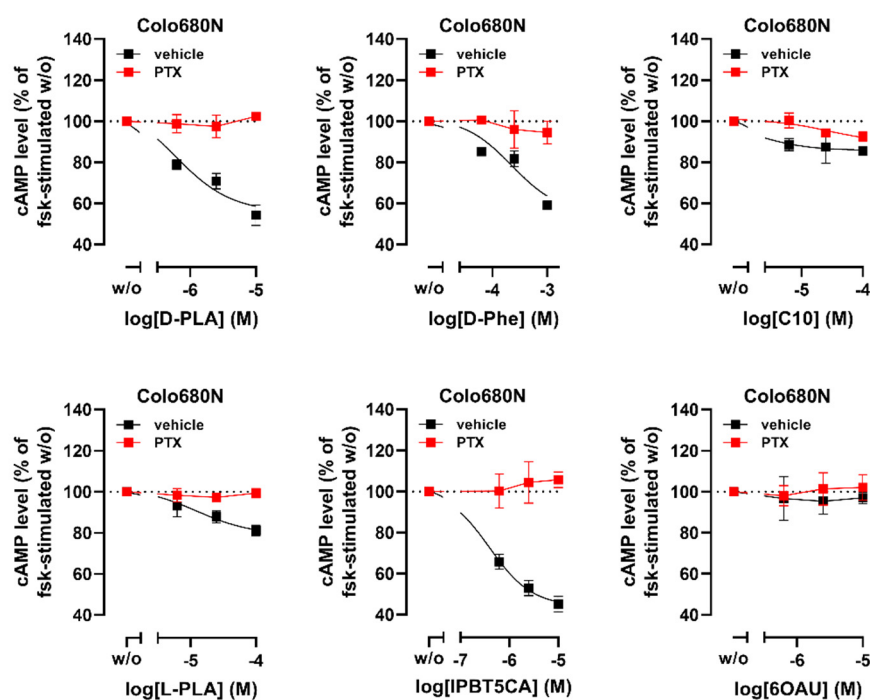

**Figure S11 PTX-sensitive cAMP inhibitory response of Colo680N cells when stimulated with HCA<sub>3</sub> agonists but no signal upon stimulation with GPR84 agonists.** cAMP inhibition assays in the absence and presence of 100 ng/ml pertussis toxin (PTX) confirmed presence of HCA<sub>3</sub> and absence of GPR84 in Colo680N cells. Data is shown as mean  $\pm$  SEM of three independent experiments each carried out in triplicates. IPBT5CA, 1-(1-methylethyl)-1H-benzotriazole-5-carboxylic acid; 6OAU, 6-(octylamino)-2,4(1H,3H)-pyrimidinedione

### Supplementary Table S1

Primers used for GPR84, dynamin-2, HCA<sub>3</sub> amplification, sequencing and introduction of epitope tags

| ID   | sequence (5' - 3')                                | purpose                                  |
|------|---------------------------------------------------|------------------------------------------|
| 789  | GTGCAAATCAAAGAACTGCTCCTC                          | pcDps forward (amplification/sequencing) |
| 790  | CCTGGTTCTTTCCGCCTCAGAAG                           | pcDps reverse (amplification/sequencing) |
| 2291 | CGCCGCACTAGTTCACCTTATCGTCATCGTCCTTATAGTC          | FLAG-uni- <i>Spe I</i> AS                |
| 2292 | CGCCGGGTACCTCACTCACTTATCGTCATCGTCCTTATAGTC        | FLAG-uni- <i>KpnI</i> AS                 |
| 2285 | CGCGAATTCCCCACCATGTACCCCTACGACGTCCCCGACTACGCC     | HA-uni-Kozak- <i>Eco RI</i> S            |
| 2289 | CGCCCCGGGCCACCATGTACCCCTACGACGTCCCCGACTACGCC      | HA-uni-Kozak- <i>Xma I</i> S             |
| 311  | TCCACCCTCTGCCTCTTTAG                              | human GPR84-33-5UTR-S                    |
| 312  | TGTTGTGAAAATGCCACAT                               | human GPR84-105-3UTR-AS                  |
| 313  | GATAGTGCTGGCACTGGTGA                              | human GPR84-408-ORF-S                    |
| 314  | GCTCAGATGAAATCCCCTCA                              | human-GPR84-772-ORF-AS                   |
| 315  | TGAAGCCTAACTGTCCACCA                              | human GPR84-6-mRNA-S                     |
| 316  | GCTGGGGAGAGATTGTTGTG                              | human GPR84-1411-mNA-AS                  |
| 317  | ACGTCCCCGACTACGCCTGGAACAGCTCTGACGCC               | human GPR84- HA-adaptor                  |
| 318  | TCACCTTATCGTCATCGTCCTTATAGTCATGGAGCCTATGGAAACTCCG | human GPR84-FLAG-adaptor                 |
| 596  | TGAGGATGGCTGTCTCG                                 | mRuby-342-Seq-S                          |
| 597  | GGCATCTTGATGTTCCCG                                | mRuby-581-Seq-AS                         |
| 586  | GCCAGAGCGCCGGCAAGAGTTCGGTGCTC                     | rat dynamin-2 Lys44-S                    |
| 587  | GAGCACCGAACCTTTGCCGGCGCTCTGGC                     | rat dynamin-2 Lys44-AS                   |
| 590  | GAACATCCACGGAGTCGCGACGGGGCTCTTCAC                 | rat dynamin-2 Ala399 S                   |
| 591  | GTGAAGAGCCCCGTCGCGACTCCGTGGATGTTT                 | rat dynamin-2 Ala399 AS                  |
| 604  | AACCGAATTCCCCACCATGGGCAACCGCG                     | rat dynamin-2 EcoRI-Kozak-S              |
| 605  | CAGTACTAGTTCAGTCGAGCAGGGACGG                      | rat dynamin-2 TGA-SpeI-AS                |
| 606  | CGTCCCTGCTCGACGTGAGCAAGGGCGA                      | rat dynamin-2 YFP-S                      |
| 607  | TCGCCCTTGCTCACGTGAGCAGGGACG                       | rat dynamin-2 YFP-AS                     |
| 608  | CAGTACTAGTTTACTTGTACAGCTCGTCCA                    | YFP-SpeI TGA-AS                          |
| 609  | ACTTGGTGGACTCCTATGTG                              | rat dynamin-2-S-1989S-seq                |
| 610  | GGACCACAGAATGTGTTTGC                              | rat dynamin-2-S-2456S-seq                |
| 576  | AACCGAATTCCCCACCATGAATCGGCACCATCTG                | EcoRI-ATG-HCAR3-sense                    |
| 711  | ATTGCTAGCCCCACCATGAATCGGC                         | HCAR3-PK1-NheI-S                         |
| 712  | ACCTCCCAATTCGAAGCTTGACTCGATGCAACA                 | HCAR3-PK1-HindIII-AS                     |
| 719  | ATTGCTAGCCCCACCATGTGGAACAGC                       | GPR84-PK1-NheI-S                         |
| 720  | ACCTCCCAATTCGAGATCTGAATGGAGCCTATG                 | GPR84-PK1-BglII-AS                       |
| 577  | CTCTTCGCCCTTAGACACCTCGATGCAACAGCCC                | HCAR3-mRuby-AS                           |
| 578  | GGGCTGTTGCATCGAGGTGTCTAAGGGCGAAGAG                | HCAR3-mRuby-S                            |

**Supplementary Table S2**

CHO-K1 cells were transfected with receptor constructs and agonist-induced DMR response, inhibition of cAMP accumulation and ERK activation was determined (see Methods). E<sub>max</sub> and EC<sub>50</sub> values were determined from concentration-response curves of agonists 3HO, 3HDec and C10 using GraphPad Prism. Data are given as mean with 95% confidence interval of n ≥ 3 independent experiments each performed in triplicates.

|                        | <b>3HO</b>                                    |                                      | <b>3HDec</b>                                  |                                      | <b>C10</b>                                  |                                      |
|------------------------|-----------------------------------------------|--------------------------------------|-----------------------------------------------|--------------------------------------|---------------------------------------------|--------------------------------------|
|                        | E <sub>max</sub><br>(95% CI)                  | EC <sub>50</sub><br>(μM)<br>(95% CI) | E <sub>max</sub><br>(95% CI)                  | EC <sub>50</sub><br>(μM)<br>(95% CI) | E <sub>max</sub><br>(95% CI)                | EC <sub>50</sub><br>(μM)<br>(95% CI) |
| <b>HCA<sub>3</sub></b> |                                               |                                      |                                               |                                      |                                             |                                      |
| <b>EPIC</b>            | <i>DMR shift in pm</i>                        |                                      | <i>DMR shift in pm</i>                        |                                      | <i>DMR shift in pm</i>                      |                                      |
| 10 min                 | 144.6 (119.7 – 183.5)                         | 16.5 (7.0 – 41.7)                    | 71.9 (58.1 – 90.4)                            | 84.4 (43.3 – 175.8)                  | n.d.                                        | n.d.                                 |
| 20 min                 | 124.2 (62.6 – 185.9)                          | 8.0 (2.3 – 27.2)                     | 133.7 (108.4 – 168.9)                         | 96.7 (51.0 – 196.6)                  | n.d.                                        | n.d.                                 |
| 40 min                 | 77.0 (24.4 – 129.5)                           | 11.6 (1.78 – 70.7)                   | 139.5 (113.1 – 165.8)                         | 89.6 (53.5 – 152.3)                  | n.d.                                        | n.d.                                 |
| <b>cAMP</b>            | <i>% of w/o agonist</i><br>22.1 (19.4 – 24.8) | 1.6 (0.9 – 3.1)                      | <i>% of w/o agonist</i><br>30.1 (21.5 – 39.9) | 28.8 (17.8 – 46.6)                   | <i>% of w/o agonist</i><br>n.d.             | n.d.                                 |
| <b>ERK</b>             | <i>x-fold of w/o</i><br>7.0 (6.2 – 7.8)       | 8.7 (1.7 – 19.2)                     | <i>x-fold of w/o</i><br>6.8 (6.0 – 7.6)       | 54 (25.3 – 81.7)                     | <i>x-fold of w/o</i><br>n.d.                | n.d.                                 |
| <b>GPR84</b>           |                                               |                                      |                                               |                                      |                                             |                                      |
| <b>EPIC</b>            | <i>DMR shift in pm</i>                        |                                      | <i>DMR shift in pm</i>                        |                                      | <i>DMR shift in pm</i>                      |                                      |
| 10 min                 | n.d.                                          | n.d.                                 | 86.8 (74.5 – 100.3)                           | 18.1 (8.9 – 35.9)                    | 115.6 (94.1 – 144.4)                        | 4.5 (1.2 – 19.8)                     |
| 20 min                 | n.d.                                          | n.d.                                 | 125.3 (102.3 – 151.7)                         | 20.7 (8.3 – 50.5)                    | 140.1 (103.5 – 198.4)                       | 4.1 (0.66 – 37.8)                    |
| 40 min                 | n.d.                                          | n.d.                                 | 119.4 (82.3 – 177.3)                          | 48.0 (13.0 – 205.8)                  | 142.1 (61.8 – 222.5)                        | 6.7 (1.4 – 34.0)                     |
| <b>cAMP</b>            | <i>% of w/o agonist</i><br>n.d.               | n.d.                                 | <i>% of w/o agonist</i><br>30.5 (24.4 – 36.7) | 9.8 (5.8 – 16.6)                     | <i>% of w/o agonist</i><br>30.2 (25 – 35.4) | 3.4 (2.4 – 4.8)                      |
| <b>ERK</b>             | <i>x-fold of w/o</i><br>n.d.                  | n.d.                                 | <i>x-fold of w/o</i><br>2.8 (2.5 – 3.1)       | 32.2 (12.4 – 47.5)                   | <i>x-fold of w/o</i><br>3.0 (2.7 – 3.3)     | 7.9 (3.8 – 11.8)                     |

### Supplementary Table S3

CHO-K1 cells were transfected with receptor constructs and agonist-induced inhibition of cAMP accumulation was determined (see Methods). Data are given as cAMP level (% of forskolin stimulated w/o agonist) for each receptor construct (mean  $\pm$  SEM of  $n \geq 3$  independent experiments each performed in triplicates).

| cAMP                    | vehicle         | 80 $\mu$ M<br>dynasore | 0.4 M<br>sucrose | vehicle         | 100 $\mu$ M<br>barbardin | 3 mM<br>M $\beta$ CD | vehicle          | 50 $\mu$ M<br>gallein |
|-------------------------|-----------------|------------------------|------------------|-----------------|--------------------------|----------------------|------------------|-----------------------|
| <b>HCA<sub>3</sub></b>  |                 |                        |                  |                 |                          |                      |                  |                       |
| 1.5 $\mu$ M<br>3HO      | 61.5 $\pm$ 6.1  | 91.7 $\pm$ 2.9         | 72.1 $\pm$ 6.2   | 82.8 $\pm$ 1.7  | 92.4 $\pm$ 3.4           | 91.8 $\pm$ 2.0       | 58.2 $\pm$ 2.1   | 77.8 $\pm$ 4.8        |
| 6.25 $\mu$ M<br>3HO     | 34.7 $\pm$ 2.1  | 54.9 $\pm$ 7.9         | 45.3 $\pm$ 5.6   | 66.7 $\pm$ 0.6  | 77.2 $\pm$ 3.4           | 78.3 $\pm$ 2.1       | 47.6 $\pm$ 1.9   | 61.1 $\pm$ 1.6        |
| 25 $\mu$ M<br>3HO       | 27.5 $\pm$ 3.9  | 48.9 $\pm$ 4.2         | 33.2 $\pm$ 3.1   | 57.1 $\pm$ 3.4  | 68.2 $\pm$ 4.1           | 67.0 $\pm$ 2.4       | 38.6 $\pm$ 1.5   | 44.3 $\pm$ 0.7        |
| 6.25 $\mu$ M<br>3HDec   | 77.9 $\pm$ 4.5  | 106.7 $\pm$ 8.1        | 92.1 $\pm$ 1.4   | 86.8 $\pm$ 2.8  | 88.0 $\pm$ 4.3           | 100.9 $\pm$ 2.4      | 75.2 $\pm$ 3.0   | 100.4 $\pm$ 7.2       |
| 25 $\mu$ M<br>3HDec     | 52.6 $\pm$ 4.4  | 105.4 $\pm$ 8.5        | 74.3 $\pm$ 2.7   | 82.7 $\pm$ 1.7  | 81.9 $\pm$ 2.5           | 91.4 $\pm$ 2.1       | 65.9 $\pm$ 5.0   | 89.1 $\pm$ 5.0        |
| 100 $\mu$ M<br>3HDec    | 53.1 $\pm$ 5.5  | 77.9 $\pm$ 4.0         | 55.3 $\pm$ 5.5   | 73.0 $\pm$ 4.0  | 68.4 $\pm$ 4.6           | 84.5 $\pm$ 2.1       | 53.7 $\pm$ 2.9   | 66.1 $\pm$ 4.6        |
| <b>GPR84</b>            |                 |                        |                  |                 |                          |                      |                  |                       |
| 1.5 $\mu$ M<br>C10      | 76.7 $\pm$ 4.0  | 92.8 $\pm$ 7.3         | 77.4 $\pm$ 1.8   | 74.8 $\pm$ 3.6  | 80.5 $\pm$ 4.8           | 90.4 $\pm$ 3.0       | 72.6 $\pm$ 3.4   | 97.1 $\pm$ 5.1        |
| 6.25 $\mu$ M<br>C10     | 47.4 $\pm$ 1.3  | 61.8 $\pm$ 4.2         | 50.4 $\pm$ 2.6   | 61.1 $\pm$ 2.8  | 66.8 $\pm$ 3.3           | 78.7 $\pm$ 1.6       | 64.2 $\pm$ 1.9   | 85.5 $\pm$ 2.9        |
| 25 $\mu$ M<br>C10       | 33.4 $\pm$ 0.3  | 46.5 $\pm$ 3.7         | 35.0 $\pm$ 1.0   | 47.0 $\pm$ 1.2  | 55.3 $\pm$ 3.5           | 64.5 $\pm$ 3.2       | 51.5 $\pm$ 3.0   | 67.9 $\pm$ 4.8        |
| 6.25 $\mu$ M<br>3HDec   | 67.5 $\pm$ 5.0  | 75.9 $\pm$ 1.6         | 78.5 $\pm$ 7.1   | 47.1 $\pm$ 3.9  | 46.2 $\pm$ 2.2           | 48.4 $\pm$ 2.6       | 56.0 $\pm$ 2.4   | 56.4 $\pm$ 3.2        |
| 25 $\mu$ M<br>3HDec     | 49.2 $\pm$ 4.9  | 52.0 $\pm$ 2.7         | 47.4 $\pm$ 3.1   | 36.0 $\pm$ 4.0  | 33.9 $\pm$ 2.2           | 36.0 $\pm$ 3.0       | 44.0 $\pm$ 2.5   | 45.6 $\pm$ 2.2        |
| 100 $\mu$ M<br>3HDec    | 36.8 $\pm$ 5.6  | 33.3 $\pm$ 4.3         | 34.4 $\pm$ 3.3   | 30.8 $\pm$ 1.9  | 27.9 $\pm$ 1.1           | 27.5 $\pm$ 2.0       | 47.2 $\pm$ 2.3   | 42.1 $\pm$ 2.4        |
| <b>empty<br/>vector</b> |                 |                        |                  |                 |                          |                      |                  |                       |
| 1.5 $\mu$ M<br>3HO      | 99.5 $\pm$ 5.0  | 102.4 $\pm$ 4.5        | 96.4 $\pm$ 2.6   | 97.0 $\pm$ 2.1  | 102.9 $\pm$ 4.1          | 100.0 $\pm$ 2.4      | 103.6 $\pm$ 7.5  | 103.6 $\pm$ 6.0       |
| 6.25 $\mu$ M<br>3HO     | 101.9 $\pm$ 6.5 | 85.6 $\pm$ 4.3         | 103.6 $\pm$ 3.1  | 92.6 $\pm$ 1.4  | 103.3 $\pm$ 1.1          | 96.9 $\pm$ 3.5       | 105.6 $\pm$ 13.3 | 103.4 $\pm$ 9.0       |
| 25 $\mu$ M<br>3HO       | 99.2 $\pm$ 8.9  | 78.3 $\pm$ 1.2         | 94.0 $\pm$ 5.1   | 94.0 $\pm$ 1.2  | 100.0 $\pm$ 2.2          | 100.9 $\pm$ 5.9      | 92.9 $\pm$ 4.7   | 106.4 $\pm$ 10.5      |
| 1.5 $\mu$ M<br>C10      | 99.2 $\pm$ 4.9  | 95.6 $\pm$ 5.1         | 105.7 $\pm$ 3.8  | 96.7 $\pm$ 4.4  | 97.1 $\pm$ 1.9           | 102.8 $\pm$ 4.7      | 105.1 $\pm$ 5.8  | 103.6 $\pm$ 6.0       |
| 6.25 $\mu$ M<br>C10     | 93.8 $\pm$ 2.9  | 87.5 $\pm$ 11.9        | 103.4 $\pm$ 12.1 | 97.4 $\pm$ 2.3  | 98.0 $\pm$ 6.3           | 104.0 $\pm$ 5.8      | 91.6 $\pm$ 5.8   | 103.4 $\pm$ 9.0       |
| 25 $\mu$ M<br>C10       | 94.1 $\pm$ 3.7  | 91.6 $\pm$ 10.3        | 107.7 $\pm$ 6.2  | 100.6 $\pm$ 2.6 | 105.1 $\pm$ 4.1          | 103.2 $\pm$ 4.7      | 90.5 $\pm$ 4.7   | 106.4 $\pm$ 10.5      |
| 6.25 $\mu$ M<br>3HDec   | 99.3 $\pm$ 3.5  | 94.7 $\pm$ 5.5         | 100.1 $\pm$ 3.4  | 101.7 $\pm$ 5.6 | 98.7 $\pm$ 1.7           | 103.6 $\pm$ 4.8      | 99.3 $\pm$ 3.5   | 98.9 $\pm$ 6.8        |
| 25 $\mu$ M<br>3HDec     | 92.0 $\pm$ 2.9  | 92.1 $\pm$ 12.6        | 106.7 $\pm$ 5.2  | 102.3 $\pm$ 5.9 | 94.5 $\pm$ 3.5           | 99.9 $\pm$ 3.2       | 92.0 $\pm$ 2.9   | 88.5 $\pm$ 2.7        |
| 100 $\mu$ M<br>3HDec    | 90.2 $\pm$ 2.8  | 93.9 $\pm$ 6.6         | 99.5 $\pm$ 4.0   | 95.5 $\pm$ 5.0  | 91.6 $\pm$ 2.6           | 95.0 $\pm$ 5.3       | 90.2 $\pm$ 2.8   | 89.1 $\pm$ 3.5        |

**Supplementary Table S4**

CHO-K1 cells were transfected with receptor constructs and ERK activation was determined (see Methods). Data are given as pERK/total ERK (x-fold of w/o agonist) for each receptor construct (mean  $\pm$  SEM of  $n \geq 3$  independent experiments each performed in triplicates).

| ERK                    | vehicle        | 80 $\mu$ M<br>dynasore | 0.4 M<br>sucrose | vehicle       | 100 $\mu$ M<br>barbardin | 3 mM<br>M $\beta$ CD | vehicle       | 50 $\mu$ M<br>gallein | vehicle       | 25 $\mu$ M<br>ZA | vehicle       | 100 $\mu$ M<br>NSC23766 | 25 $\mu$ M<br>Ly294002 |
|------------------------|----------------|------------------------|------------------|---------------|--------------------------|----------------------|---------------|-----------------------|---------------|------------------|---------------|-------------------------|------------------------|
| <b>HCA<sub>3</sub></b> |                |                        |                  |               |                          |                      |               |                       |               |                  |               |                         |                        |
| 25 $\mu$ M<br>3HO      | n.d.           | n.d.                   | n.d.             | 2.4 $\pm$ 0.2 | 1.9 $\pm$ 0.2            | 2.6 $\pm$ 0.1        | 3.0 $\pm$ 0.1 | 1.4 $\pm$ 0.1         | 2.4 $\pm$ 0.2 | 2.0 $\pm$ 0.2    | 3.0 $\pm$ 0.1 | 2.0 $\pm$ 0.1           | 1.7 $\pm$ 0.1          |
| 100 $\mu$ M<br>3HO     | 11.6 $\pm$ 1.4 | 1.3 $\pm$ 0.2          | 4.2 $\pm$ 0.5    | 3.0 $\pm$ 0.2 | 2.3 $\pm$ 0.2            | 3.0 $\pm$ 0.1        | 3.3 $\pm$ 0.1 | 1.5 $\pm$ 0.1         | 2.7 $\pm$ 0.2 | 2.1 $\pm$ 0.2    | 3.3 $\pm$ 0.1 | 2.0 $\pm$ 0.1           | 1.9 $\pm$ 0.1          |
| 100 $\mu$ M<br>3HDec   | 8.0 $\pm$ 0.8  | 1.1 $\pm$ 0.1          | 3.0 $\pm$ 0.4    | 2.1 $\pm$ 0.2 | 2.0 $\pm$ 0.2            | 1.7 $\pm$ 0.1        | 2.2 $\pm$ 0.1 | 1.1 $\pm$ 0.1         | 2.5 $\pm$ 0.2 | 1.8 $\pm$ 0.1    | 2.2 $\pm$ 0.1 | 1.6 $\pm$ 0.1           | 1.4 $\pm$ 0.1          |
| 400 $\mu$ M<br>3HDec   | n.d.           | n.d.                   | n.d.             | 2.6 $\pm$ 0.2 | 2.7 $\pm$ 0.1            | 2.8 $\pm$ 0.1        | 2.8 $\pm$ 0.1 | 1.3 $\pm$ 0.1         | 2.6 $\pm$ 0.2 | 2.2 $\pm$ 0.2    | 2.8 $\pm$ 0.1 | 2.0 $\pm$ 0.2           | 1.8 $\pm$ 0.1          |
| <b>GPR84</b>           |                |                        |                  |               |                          |                      |               |                       |               |                  |               |                         |                        |
| 25 $\mu$ M<br>C10      | n.d.           | n.d.                   | n.d.             | 3.6 $\pm$ 0.3 | 3.5 $\pm$ 0.6            | 2.1 $\pm$ 0.3        | 3.5 $\pm$ 0.1 | 1.6 $\pm$ 0.1         | 3.6 $\pm$ 0.3 | 2.8 $\pm$ 0.3    | 3.3 $\pm$ 0.1 | 3.7 $\pm$ 0.1           | 2.0 $\pm$ 0.1          |
| 100 $\mu$ M<br>C10     | 10.6 $\pm$ 1.7 | 1.7 $\pm$ 0.1          | 3.3 $\pm$ 0.3    | 4.7 $\pm$ 0.3 | 4.7 $\pm$ 0.3            | 3.7 $\pm$ 0.4        | 3.6 $\pm$ 0.1 | 1.5 $\pm$ 0.1         | 4.7 $\pm$ 0.3 | 3.4 $\pm$ 0.1    | 3.7 $\pm$ 0.1 | 4.0 $\pm$ 0.2           | 2.5 $\pm$ 0.1          |
| 25 $\mu$ M<br>3HDec    | n.d.           | n.d.                   | n.d.             | 4.4 $\pm$ 0.3 | 4.5 $\pm$ 0.7            | 4.3 $\pm$ 0.2        | 4.1 $\pm$ 0.4 | 1.7 $\pm$ 0.1         | 4.4 $\pm$ 0.3 | 4.3 $\pm$ 0.2    | 3.9 $\pm$ 0.2 | 4.0 $\pm$ 0.1           | 3.2 $\pm$ 0.2          |
| 100 $\mu$ M<br>3HDec   | 9.6 $\pm$ 2.1  | 2.4 $\pm$ 0.5          | 2.9 $\pm$ 0.2    | 4.8 $\pm$ 0.5 | 4.8 $\pm$ 0.1            | 5.1 $\pm$ 0.1        | 4.5 $\pm$ 0.4 | 1.7 $\pm$ 0.1         | 4.8 $\pm$ 0.5 | 4.4 $\pm$ 0.4    | 4.2 $\pm$ 0.2 | 4.4 $\pm$ 0.3           | 3.4 $\pm$ 0.1          |

### Supplementary Table S5

TPM values as downloaded from <https://www.ebi.ac.uk/gxa/home> [1]

| organism part/tissue/cell type                   | Expression Atlas | HCAR3 | GPR84 |
|--------------------------------------------------|------------------|-------|-------|
| blood                                            | E-MTAB-5214      | 42    | 17    |
| neutrophil, mature                               | E-MTAB-3827      | 103   | 61    |
| monocyte, CD14-positive, CD16-negative classical | E-MTAB-3827      | 82    | 30    |
| neutrophil, segmented of bone marrow             | E-MTAB-3827      | 58    | 15    |
| macrophage, inflammatory                         | E-MTAB-3827      | 5     | 27    |
| macrophage                                       | E-MTAB-3827      | 3     | 3     |
| metamyelocyte, neutrophilic                      | E-MTAB-3827      | 0.5   | 61    |
| vermiform appendix                               | E-MTAB-2836      | 24    | 22    |
| bone marrow                                      | E-MTAB-2836      | 20    | 30    |

Experiments included: E-MTAB-2836 (Raw Data Provider: The Human Protein Atlas), E-MTAB-5214 (The Genotype-Tissue Expression (GTEx) pilot analysis) [2], 61 E-MTAB-3827 (These studies make use of data generated by the Blueprint Consortium. A full list of the investigators who contributed to the generation of the data is available from [www.blueprint-epigenome.eu](http://www.blueprint-epigenome.eu). Funding for the project was provided by the European Union's Seventh Framework Programme (FP7/2007-2013) under grant agreement no 282510 – BLUEPRINT.),

## Supplementary Results and Discussion

The human HCA<sub>3</sub> differs from gorilla HCA<sub>3</sub> only in three amino acids and a C terminus extended by 24 amino acids. The orangutan HCA<sub>3</sub> has only two differences compared to the gorilla HCA<sub>3</sub> (Tyr<sup>86</sup>; Trp<sup>142</sup>) (Figure S9D). We found that only for orangutan HCA<sub>3</sub> we do not observe similar differences between 3HO- and 3HDec-induced DMR responses in presence of dynasore compared to human HCA<sub>3</sub> (Figure S9). Thus, neither the extended C terminus nor the human HCA<sub>3</sub> specific amino acids Val<sup>156</sup>, His<sup>253</sup> and Ile<sup>317</sup> are relevant for the observed reduction in 3HDec-induced DMR response in the presence of dynasore since gorilla HCA<sub>3</sub> DMR responses to different agonists are similarly affected by dynasore. This suggests a role of Tyr<sup>86</sup> and/or Trp<sup>142</sup> for the observed effect of dynasore. Asn<sup>86</sup> of human HCA<sub>2</sub> in TM2/ECL1 has been shown to be crucial for nicotinic acid binding [3]. Tyr<sup>86</sup> of HCA<sub>3</sub> might more likely play an indirect role for the interaction of HCA<sub>3</sub> with dyn-2 whereas Trp<sup>142</sup>, located at the transition of ICL2 to TM4, could be relevant for a direct interaction. The finding that presence of dynasore causes a sustained signaling of the evolutionarily closest HCA<sub>3</sub>-relatives HCA<sub>1</sub> (Arg<sup>130</sup>) and HCA<sub>2</sub> (Arg<sup>142</sup>) further supports this hypothesis (Figure S4). DMR analyses of the gorilla and orangutan HCA<sub>3</sub> with D-PLA, ILA, D-Phe and L-PLA revealed that activation profiles and dynasore sensitivity of the DMR response are conserved between human and gorilla HCA<sub>3</sub> (Figure S9). In contrast, orangutan HCA<sub>3</sub> is less potently activated by all agonists tested and presence of dynasore rather causes sustained or unchanged signaling than inhibition (Figure S9C).

In summary, our analyses showed that dynasore affected the DMR response of human and gorilla but not orang utan HCA<sub>3</sub> to D Phe and L-PLA in a similar manner like that to 3HDec, whereas the DMR response of D-PLA and ILA was similarly affected like that one to 3HO (Figure S9). Thus, the crucial involvement of dyn-2 in HCA<sub>3</sub> signaling and trafficking is a feature acquired during evolution before the split of the human/chimpanzee/gorilla lineage.

## References

1. Petryszak R, Keays M, Tang YA, Fonseca NA, Barrera E, Burdett T, Fullgrave A, Fuentes AM, Jupp S, Koskinen S, et al: **Expression Atlas update--an integrated database of gene and protein expression in humans, animals and plants.** *Nucleic Acids Res* 2016, **44**:D746-752.
2. Carithers LJ, Moore HM: **The Genotype-Tissue Expression (GTEx) Project.** *Biopreserv Biobank* 2015, **13**:307-308.
3. Tunaru S, Lattig J, Kero J, Krause G, Offermanns S: **Characterization of determinants of ligand binding to the nicotinic acid receptor GPR109A (HM74A/PUMA-G).** *Mol Pharmacol* 2005, **68**:1271-1280.
